# Supplementary material for: Early neuronal accumulation of DNA double strand breaks in Alzheimer’s disease
Source: Springer Nature journal article supplement (doi:10.1186/s40478-019-0723-5), 2019-05-17
Supplement: MOESM1 [file 25666766]

## Supplementary Information for

### Early neuronal accumulation of DNA double strand breaks in Alzheimer's disease

Niraj M. Shanbhag<sup>1,2†</sup>, Mark D. Evans<sup>1†</sup>, Wenjie Mao<sup>1†</sup>, Alissa L. Nana<sup>2,3</sup>, William W. Seeley<sup>2,3</sup>, Anthony Adame<sup>4</sup>, Robert Rissman<sup>4</sup>, Eliezer Masliah<sup>4,5</sup>, and Lennart Mucke<sup>1,2\*</sup>

<sup>1</sup>*Gladstone Institute of Neurological Disease, San Francisco, CA 94158, USA*

<sup>2</sup>*Memory and Aging Center, Department of Neurology, University of California San Francisco, San Francisco, CA 94158, USA*

<sup>3</sup>*Department of Pathology, University of California San Francisco, San Francisco, CA 94158, USA*

<sup>4</sup>*Department of Neurosciences, University of California at San Diego, La Jolla, CA 92093, USA*

<sup>5</sup>*Present address: Division of Neuroscience, National Institute on Aging, Bethesda, MD 20892, USA*

† These authors contributed equally to this study.

\*Corresponding author

email – [lennart.mucke@gladstone.ucsf.edu](mailto:lennart.mucke@gladstone.ucsf.edu)

tel – (415) 734-2504

fax – (415) 355-0131

#### **This PDF file includes:**

Tables S1 – S3

Figures S1 – S9

**Table S1. Clinicopathological characteristics of human Cohort 1**

| Clinical Diagnosis | Age (years) | Gender | MMSE score | Braak stage | Duration (years) | PMI (hours) |
|--------------------|-------------|--------|------------|-------------|------------------|-------------|
| Ctl                | 77          | M      | 29         | 5           | N/A              | 8.4         |
| Ctl                | 76          | M      | 29         | 2           | N/A              | 8.2         |
| MCI                | 77          | M      | 28         | 2           | ND               | 4.9         |
| MCI                | 88          | F      | 30         | 3           | 11               | 15.5        |
| MCI                | 87          | F      | 27         | 4           | 3                | 9.5         |
| AD                 | 69          | F      | 27         | 6           | 9                | 12.9        |
| AD                 | 72          | M      | 13         | 6           | 12               | 6.9         |
| AD                 | 63          | M      | 7          | 6           | 6                | 17.8        |
| AD                 | 59          | M      | 15         | 6           | 12               | 5.5         |
| AD                 | 65          | F      | 18         | 6           | 11               | 10.9        |
| AD                 | 63          | M      | 4          | 6           | 12               | 6           |
| AD                 | 80          | M      | 23         | 6           | 9                | 6.5         |
| AD                 | 77          | M      | 22         | 6           | 9                | 12.9        |
| Ctl summary        | 77 ± 0.5    | 0% F   | 29 ± 0     | 3.5 ± 1.5   | N/A              | 8.3 ± 0.1   |
| MCI summary        | 84 ± 3.5    | 67% F  | 28.3 ± 0.9 | 3 ± 0.6     | 7 ± 4            | 10.0 ± 3.1  |
| AD summary         | 69 ± 2.6    | 25% F  | 16.1 ± 2.8 | 6 ± 0       | 10 ± 0.8         | 9.9 ± 1.6   |

AD, Alzheimer's disease; Ctl, control; MCI, mild cognitive impairment; MMSE, mini-mental state examination; N/A, not applicable; ND, not determined; PMI, *postmortem* interval. Summary data indicate means ± SEM, or percentage.

**Table S2. Clinicopathological characteristics of human Cohort 2**

| Clinical Diagnosis | Age (years) | Gender | Blessed score | MMSE score | Braak stage | Duration (years) | PMI (hours) |
|--------------------|-------------|--------|---------------|------------|-------------|------------------|-------------|
| Ctl                | 83          | F      | 0             | 29         | 1           | N/A              | 12          |
| Ctl                | 51          | M      | 3             | 26         | 0           | N/A              | 12          |
| Ctl                | 77          | F      | 0             | 29         | 0           | N/A              | 12          |
| Ctl                | 73          | F      | 0             | 30         | 1           | N/A              | 12          |
| Ctl                | 102         | F      | 2             | 27         | 1           | N/A              | 9           |
| Ctl                | 93          | F      | 1             | 30         | 1           | N/A              | 18          |
| Ctl                | 95          | F      | 0             | 30         | 1           | N/A              | 6           |
| Ctl                | 83          | F      | 2             | 30         | 1           | N/A              | 12          |
| MCI                | 86          | M      | 1             | 29         | 5           | 1                | 4           |
| MCI                | 90          | F      | 1             | 24         | 3           | 1                | 12          |
| MCI                | 93          | F      | 1             | 21         | 1           | 2                | 6           |
| MCI                | 84          | M      | 1             | 28         | 1           | 5                | 8           |
| MCI                | 91          | F      | 1             | 29         | 3           | 11               | 4           |
| MCI                | 80          | F      | 0             | 29         | 1           | 1                | 12          |
| MCI                | 86          | M      | 6             | 25         | 2           | 1                | 4           |
| AD                 | 88          | M      | 32            | 6          | 5           | 10               | 5           |
| AD                 | 68          | M      | 33            | 13         | 6           | 10               | 19          |
| AD                 | 79          | M      | 24            | 11         | 6           | 12               | 10          |
| AD                 | 76          | M      | 24            | 13         | 5           | 10               | 6           |
| AD                 | 89          | F      | 30            | 27         | 5           | 9                | 18          |
| AD                 | 88          | F      | 19            | 16         | 6           | 12               | 12          |
| AD                 | 81          | M      | 26            | 15         | 6           | 13               | 8           |
| AD                 | 87          | M      | 26            | 8          | 6           | 8                | 7           |
| Ctl summary        | 82 ± 5.6    | 88% F  | 1 ± 0.4       | 28.9 ± 0.5 | 0.8 ± 0.2   | N/A              | 12 ± 1      |
| MCI summary        | 87 ± 1.6    | 57% F  | 1.6 ± 0.8     | 26.4 ± 1.2 | 2.3 ± 0.6   | 3.1 ± 1.4        | 7 ± 1       |
| AD summary         | 82 ± 2.6    | 25% F  | 26.8 ± 1.7    | 13.6 ± 2.3 | 5.6 ± 0.2   | 10.5 ± 0.6       | 11 ± 2      |

AD, Alzheimer's disease; Ctl, control; MCI, mild cognitive impairment; MMSE, mini-mental state examination; N/A, not applicable; PMI, *postmortem* interval. Summary data indicate means ± SEM, or percentage.

**Table S3. Antibodies used in this study**

| Antibody target                        | Source          | Cat. No.  | Species/clonality | Application | Dilution      | Figures                              |
|----------------------------------------|-----------------|-----------|-------------------|-------------|---------------|--------------------------------------|
| <b>53BP1</b>                           | Novus           | NB100-304 | Rabbit/Polyclonal | IHC         | 1:10000       | 2, S4                                |
| <b>53BP1</b>                           | Novus           | NB100-304 | Rabbit/Polyclonal | IHC         | 1:1000        | S6, S8                               |
| <b>53BP1</b>                           | Abcam           | ab87097   | Rabbit/Polyclonal | IHC         | 1:1000        | S7                                   |
| <b>Amyloid-<math>\beta</math> 82E1</b> | IBL AMERICA     | 10323     | Mouse/Monoclonal  | IHC         | 1:500         | S5                                   |
| <b>Biotin</b>                          | Abcam           | Ab53494   | Rabbit/Polyclonal | DI-PLA      | 1:2000        | 6, 7d, S9                            |
| <b>Calbindin</b>                       | Abcam           | AB82812   | Mouse/Monoclonal  | IHC         | 1:1000        | S5                                   |
| <b>GFAP</b>                            | Millipore       | IF03L     | Mouse/Monoclonal  | IHC         | 1:500         | 1, 2, S4                             |
| <b><math>\gamma</math>H2AX</b>         | Millipore       | MABE205   | Rabbit/Monoclonal | IHC         | 1:100         | 1, S2b, S4                           |
| <b><math>\gamma</math>H2AX</b>         | Millipore       | MABE205   | Rabbit/Monoclonal | ICC         | 1:1000        | 4c, 5c                               |
| <b><math>\gamma</math>H2AX</b>         | Abcam           | ab26350   | Mouse/Monoclonal  | IHC         | 1:1000        | 3, 4a, 7b, 7c, S1, S2a, S3, S6, S8   |
| <b><math>\gamma</math>H2AX</b>         | Abcam           | ab26350   | Mouse/Monoclonal  | DI-PLA      | 1:4000        | 6, 7d, S9                            |
| <b>NeuN</b>                            | Millipore       | MAB377    | Mouse/Monoclonal  | IHC         | 1:2000        | 1, 2, S2b, S4                        |
| <b>NeuN</b>                            | Abcam           | ab104224  | Mouse/Monoclonal  | IHC         | 1:1000-1:2000 | 3, 4a, 5c, 6, 7, S1, S2a, S3, S6, S9 |
| <b>NeuN</b>                            | Abcam           | ab104224  | Mouse/Monoclonal  | ICC         | 1:2000        | 4c                                   |
| <b>Parvalbumin</b>                     | Swant           | PV27      | Rabbit/Polyclonal | IHC         | 1:3000        | 3                                    |
| <b>Phospho-Tau PHF1</b>                | Dr. Peter Davis | N/A       | Mouse/Monoclonal  | IHC         | 1:2000        | S5                                   |

DI-PLA, DNA damage *in situ* ligation followed by proximity ligation assay; ICC, immunocytochemistry; IHC, immunohistochemistry; N/A, not applicable



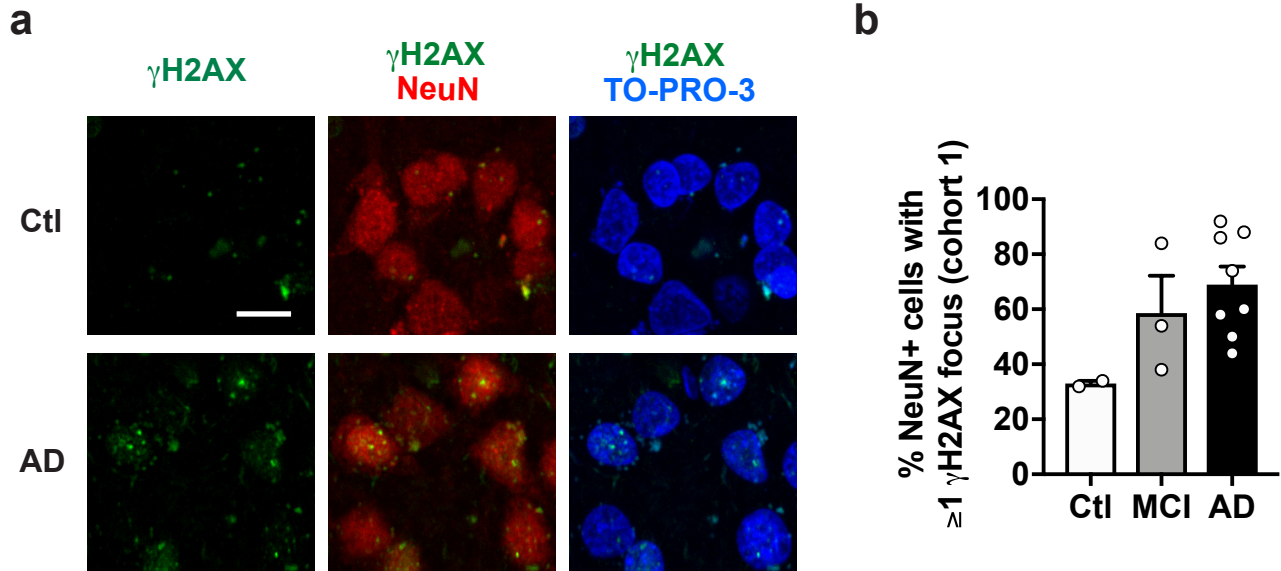

**Figure S1** Neuronal  $\gamma$ H2AX labeling in frontal cortex of humans with or without MCI or AD. **a** Representative confocal microscopic images of *postmortem* frontal cortex sections from a cognitively unimpaired control (Ctl) and a case with AD of Cohort 1. Samples were immunostained for  $\gamma$ H2AX (green) and the neuronal marker NeuN (red). Nuclei were stained with TO-PRO-3 (blue). Scale bar: 10  $\mu$ m. **b** Proportion (%) of neurons with at least one  $\gamma$ H2AX focus in the frontal cortex of cognitively unimpaired controls (Ctl, n = 2) and cases with MCI (n = 3) or AD (n = 8) from Cohort 1. Bars indicate mean  $\pm$  SEM and dots individual cases.

**a**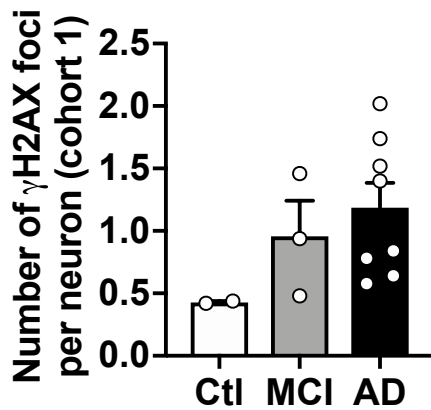**b**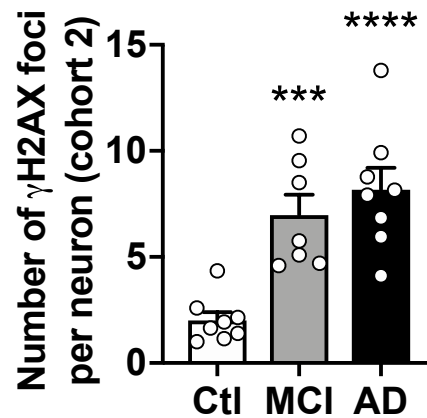

**Figure S2** Neuronal  $\gamma$ H2AX labeling in frontal cortex of humans with or without MCI or AD. **a** Number of  $\gamma$ H2AX foci per neuron in the frontal cortex in cognitively unimpaired controls (Ctl) and cases with MCI or AD of Cohort 1 (n = 2 Ctl, 3 MCI, 8 AD). **b** Number of  $\gamma$ H2AX foci per neuron in the frontal cortex in cases of Cohort 2 (n = 8 Ctl, 7 MCI, 8 AD). \*\*\* $p$  < 0.001, \*\*\*\* $p$  < 0.0001 vs. Ctl by one-way ANOVA and Holm-Sidak test. Bars indicate mean  $\pm$  SEM and dots individual cases.

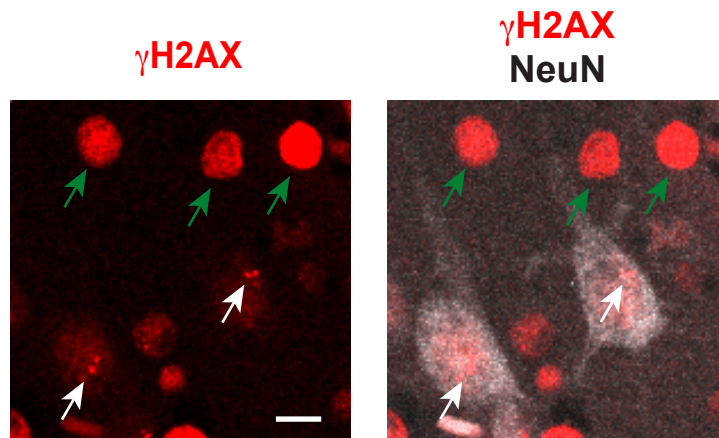

**Figure S3** Non-neuronal pan-nuclear H2AX phosphorylation in AD. Representative confocal microscopic images of frontal cortex sections from an AD case of Cohort 1. *Left:*  $\gamma$ H2AX alone. *Right:* Merge of  $\gamma$ H2AX (red) and NeuN co-labeling (gray). White arrows indicate  $\gamma$ H2AX foci suggestive of DSBs in neurons. Green arrows indicate pan-nuclear  $\gamma$ H2AX labeling in non-neuronal cells. Scale bar: 10  $\mu$ m.

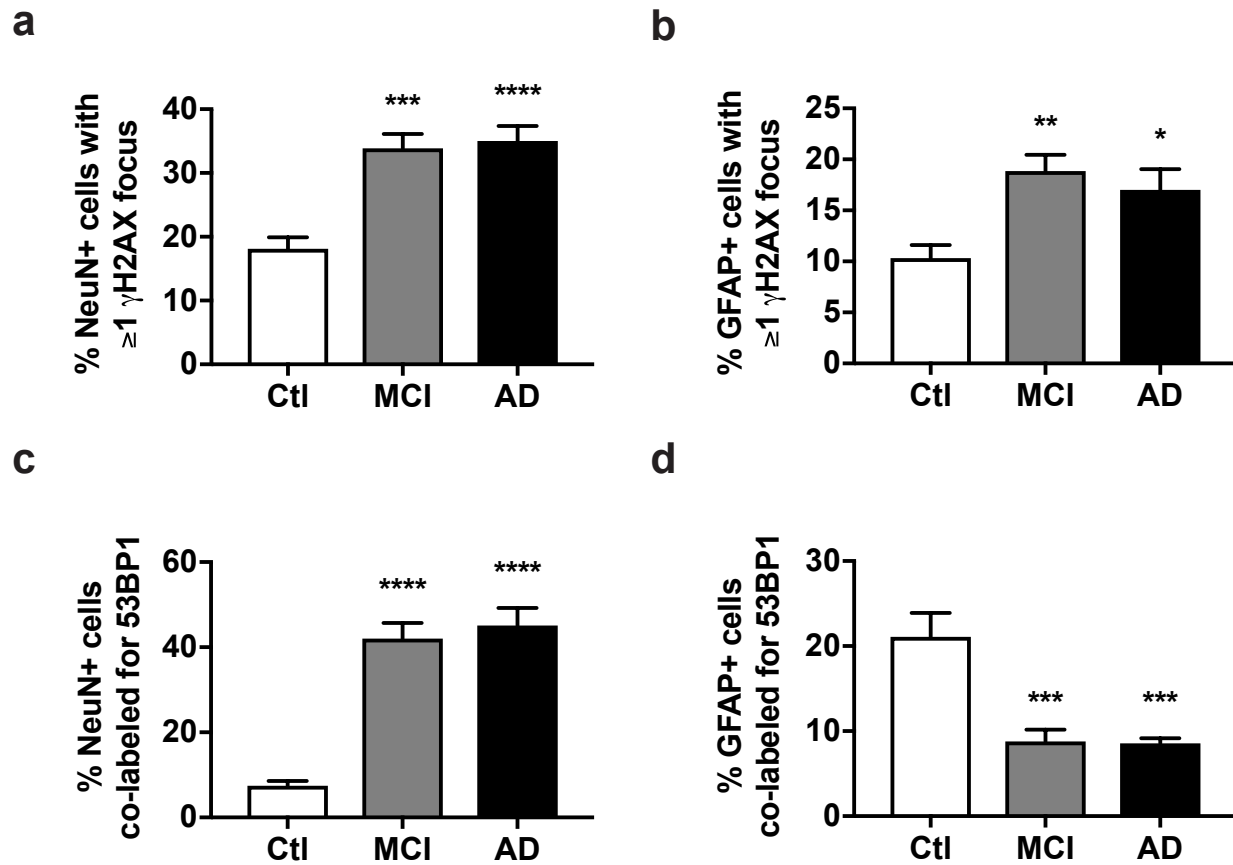

**Figure S4** Neuronal and astroglial  $\gamma$ H2AX and 53BP1 labeling in the hippocampal CA1 region of cases with MCI or AD. **a, b** Proportion (%) of neurons (**a**) and astrocytes (**b**) with one or more  $\gamma$ H2AX foci in cognitively unimpaired controls (Ctl) and cases with MCI or AD. **c, d** Proportion (%) of 53BP1-labeled neurons (**c**) and astrocytes (**d**) in the same cases.  $n = 8$  Ctl, 7 MCI and 8 AD cases from Cohort 2. \* $p < 0.05$ , \*\* $p < 0.01$ , \*\*\* $p < 0.001$ , \*\*\*\* $p < 0.0001$  vs. Ctl by one-way ANOVA and Holm-Sidak test. Bars represent means  $\pm$  SEM.

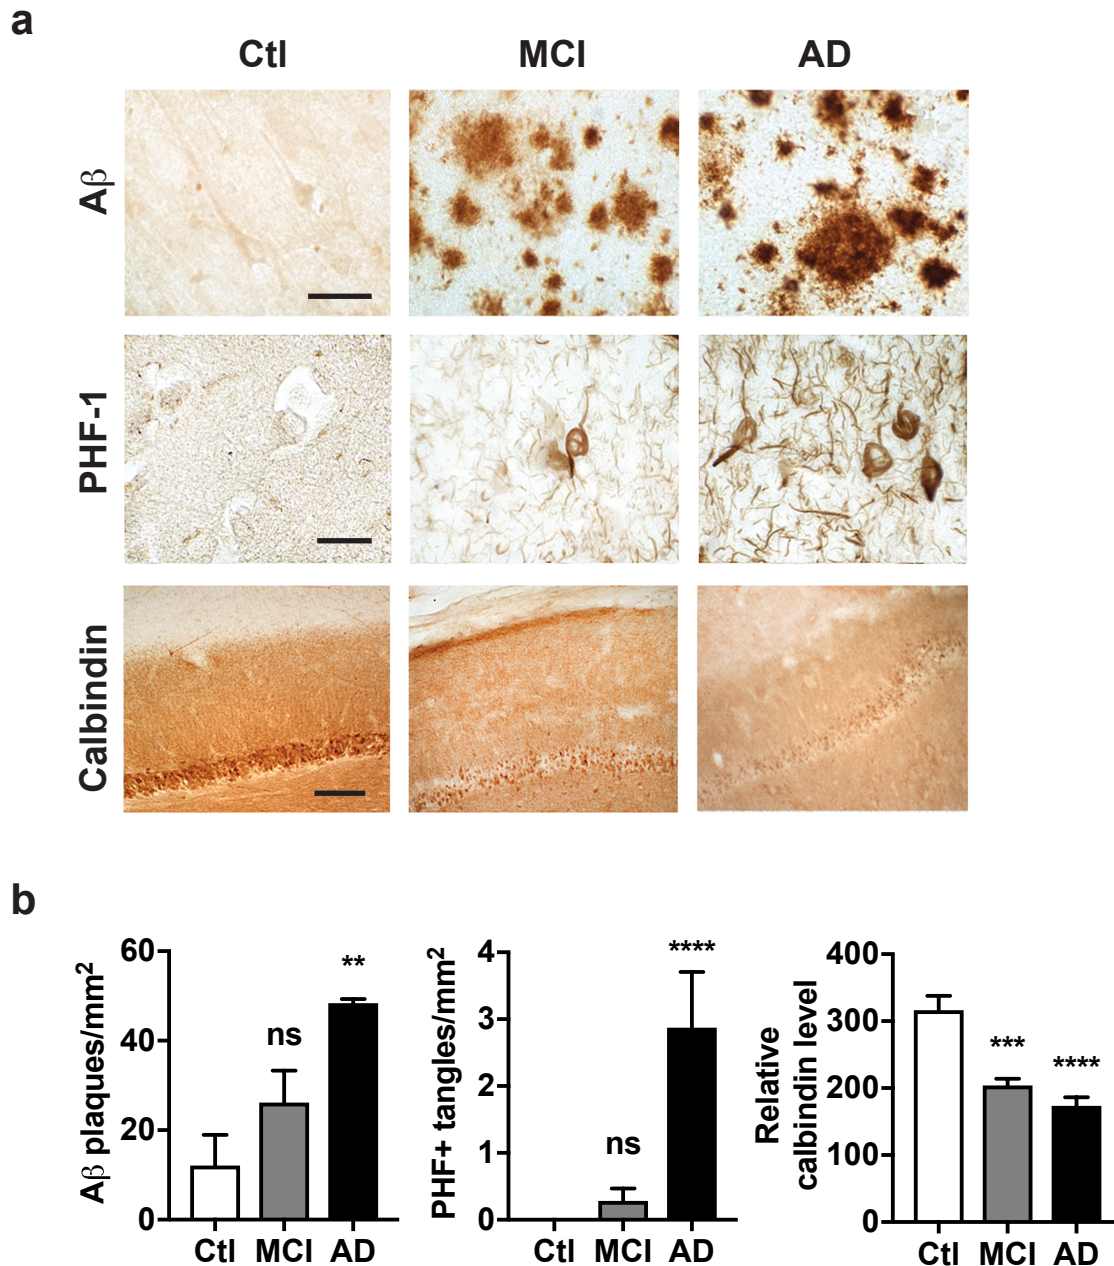

**Figure S5** Neuropathological alterations in human Cohort 2. Sections of the frontal cortex were immunoperoxidase-stained for A $\beta$  (4G8; top), phosphorylated tau (PHF-1; middle), or calbindin (bottom). **a** Representative light microscopic images. Scale bars: 20  $\mu$ m (top and middle), 100  $\mu$ m (bottom). **b** Quantitations of A $\beta$  deposits, PHF-1-positive inclusions, and relative densities of calbindin immunoreactivity. n = 8 cognitively unimpaired controls (Ctl), 7 MCI and 8 AD cases. \*\*p < 0.01, \*\*\*p < 0.001, \*\*\*\*p < 0.0001 vs. Ctl by Kruskal-Wallis and Holm-Sidak test. ns, not significant. Bars represent means  $\pm$  SEM.

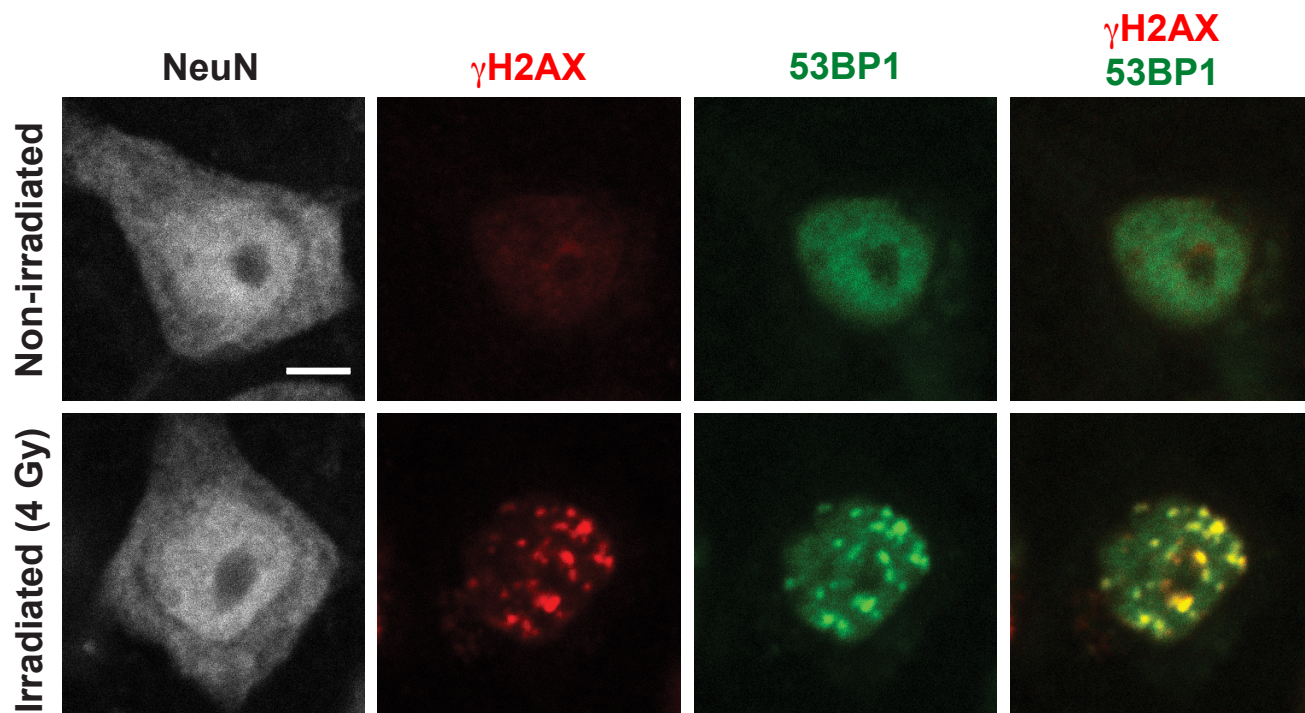

**Figure S6** Ionizing radiation causes focal accumulation of  $\gamma$ H2AX and 53BP1 in neuronal nuclei of mice. Representative confocal microscopic images of somatosensory cortex sections immunostained for NeuN (gray),  $\gamma$ H2AX (red) and 53BP1 (green) from mice that were not irradiated (top) or exposed to whole-body ionizing radiation (4 Gy) 1 h before analysis (bottom). Scale bar: 10  $\mu$ m.



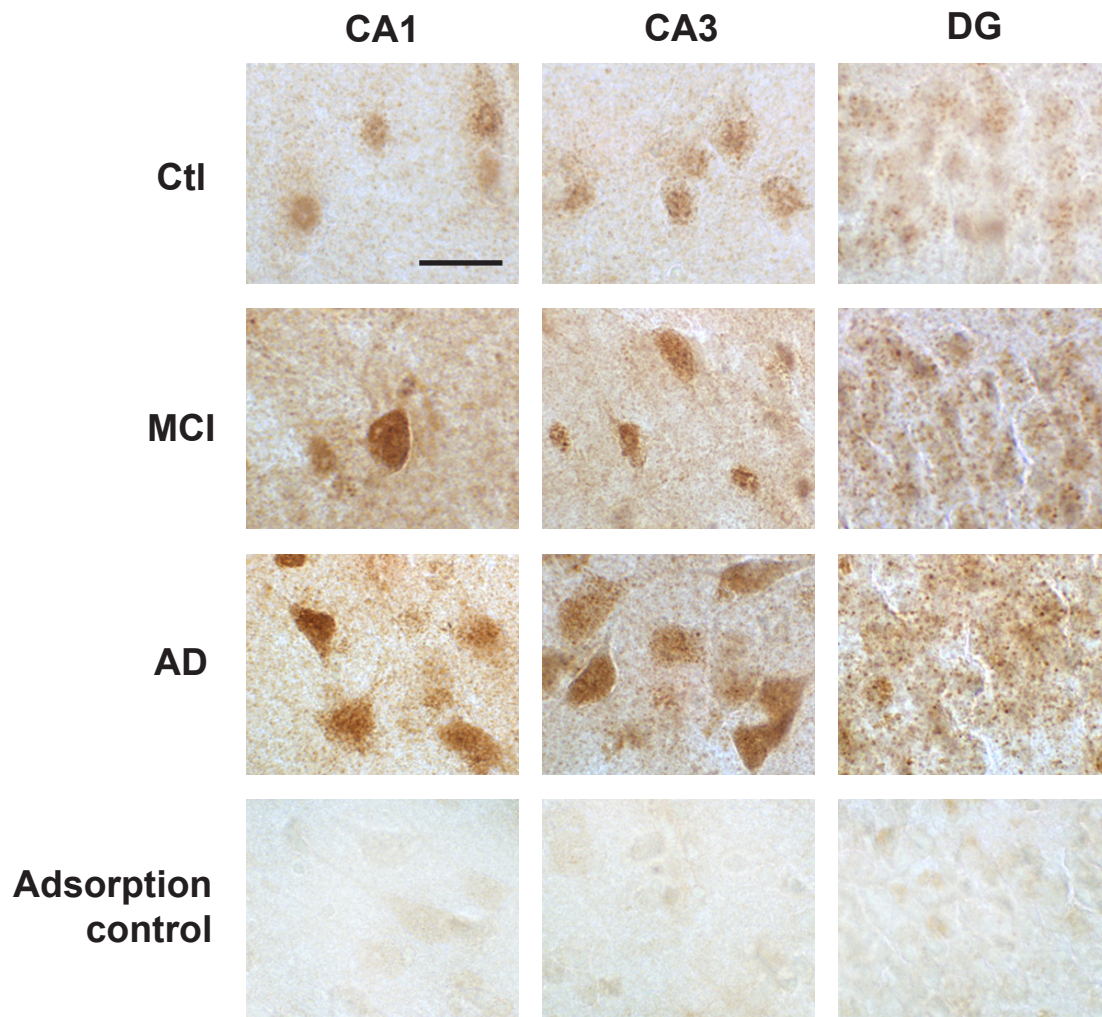

**Figure S7** Increased hippocampal 53BP1 staining in humans with MCI or AD. Sections from the indicated cases (Cohort 2) and brain regions were immunoperoxidase-stained for 53BP1 and imaged by light microscopy. Preadsorption of the antibody with a peptide corresponding to the 53BP1 immunogen eliminated most of the staining (bottom). The preadsorption control was performed on tissues from an AD case. Scale bar: 30  $\mu$ m.

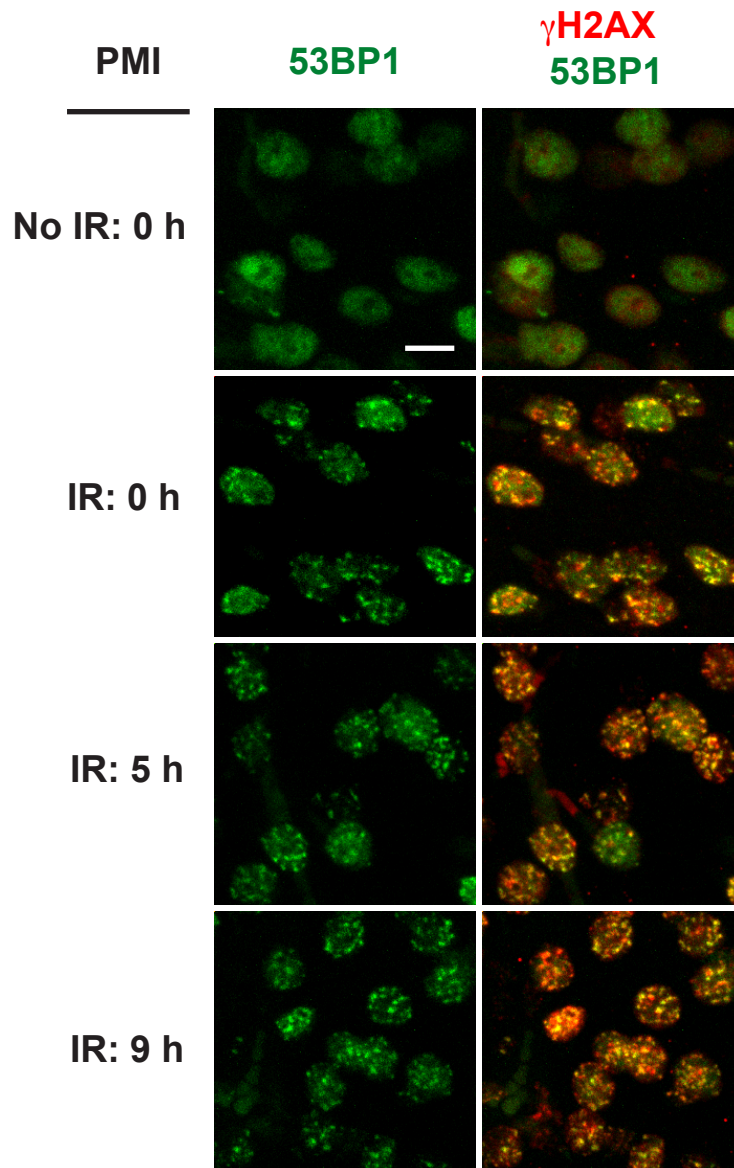

**Figure S8** Increasing the *postmortem* interval (PMI) to 9 h does not change 53BP1 or  $\gamma$ H2AX labeling of irradiation-induced DSBs in mouse brains. Representative confocal images of somatosensory cortex from 4–6-month-old mice that were not irradiated (top) or exposed to whole-body ionizing radiation (4 Gy) 30 min before sacrifice (other rows). Brains were fixed immediately (PMI: 0 h) or left at room temperature for 2 h and then for 3 or 7 h at 4° C for total PMIs of 5 and 9 h, respectively. All brains were drop-fixed in 10% neutral buffered formalin for 48 h and processed for 53BP1 (green) and  $\gamma$ H2AX (red) immunostaining. Scale bar: 10  $\mu$ m.



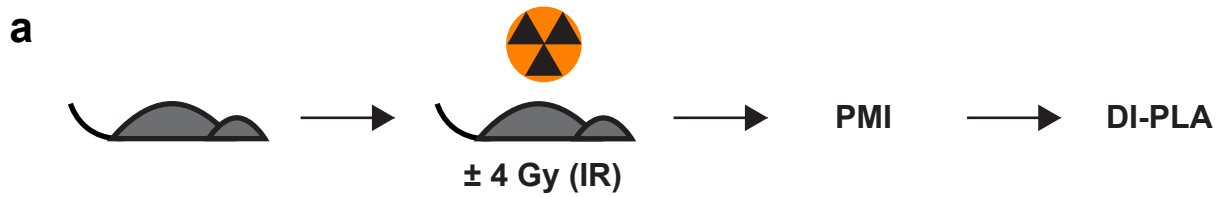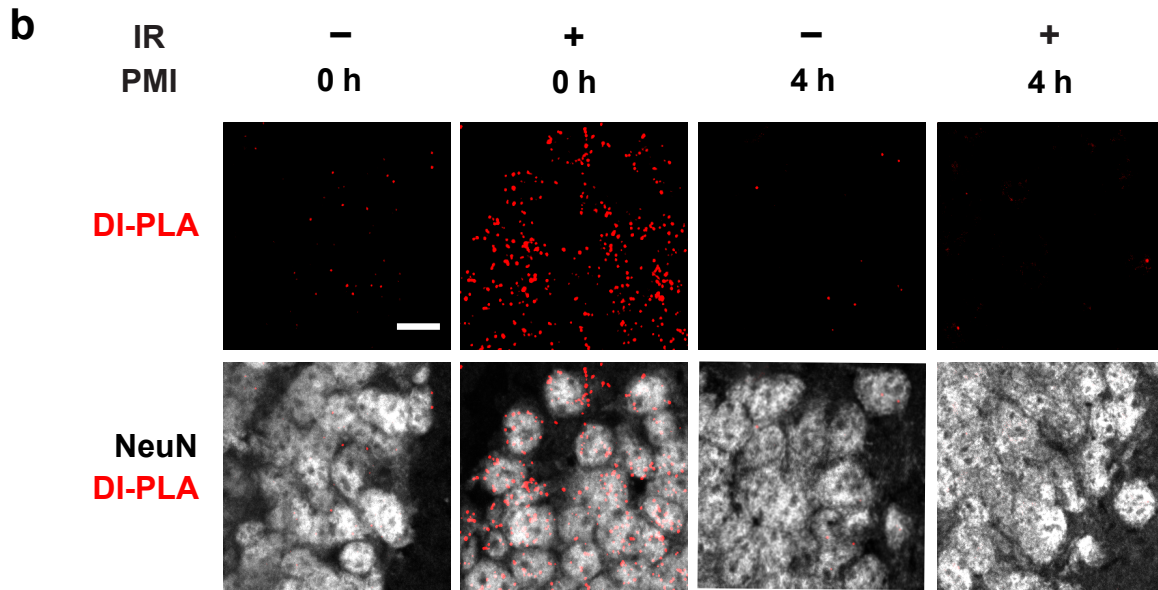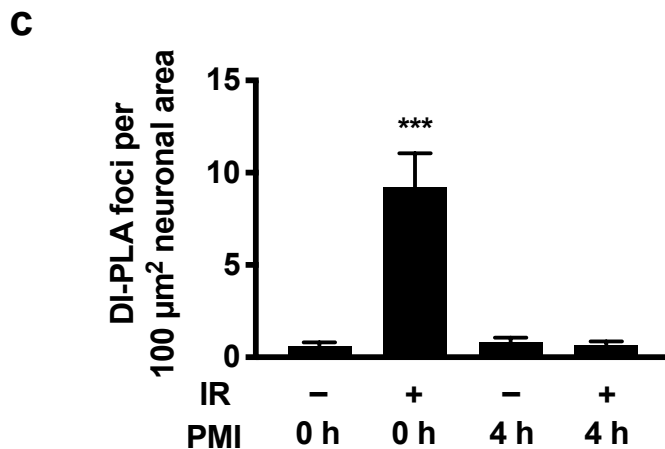

**Figure S9** *Postmortem* delays in tissue processing and *postmortem* irradiation do not cause DI-PLA signals in mouse brains. **a** Schematic of experimental design. Mice were or were not exposed to whole-body ionizing radiation (4 Gy) 15 min before they were sacrificed. Brain tissues were processed for DI-PLA immediately after mice were killed or after mice were left for 2 h at room temperature and then for 2 h at  $4^\circ\text{C}$  for a total PMI of 4 h. **b** Representative confocal images of dentate gyrus sections. DI-PLA signals (top) and merged view with NeuN co-labeling (bottom) are shown. Scale bar:  $10 \mu\text{m}$ . **c** Number of DI-PLA foci per  $100 \mu\text{m}^2$  neuronal area in the apex of the dentate gyrus.  $n = 7-8$  mice per group. \*\*\* $p < 0.001$  vs leftmost bar by Kruskal-Wallis and Holm-Sidak tests. Bars represent means  $\pm$  SEM.
